# Supplementary material for: Fluctuations in quality of life and immune responses during intravenous immunoglobulin infusion cycles
Source: PubMed Central journal article supplement (PMC8939786; doi:10.1371/journal.pone.0265852), 2022-03-22

**Fig S1. Modified SF-12 and Visual Analog Scale**

Subject ID: \_\_\_\_\_

Visit Date: \_\_\_\_\_

**Instructions for Completing the Questionnaire**

Please answer every question. Some questions may look like others, but each one is different. Please take the time to read and answer each question carefully by filling in the bubble that best represents your response.

**Your Health in General**

In the past week, did you have any infection?      Yes      No  
 If yes, what kind? \_\_\_\_\_  
 Did you see a doctor/nurse?      Yes      No  
 Did you receive treatment?      Yes      No  
 Did you have flu-like symptoms:      Yes      No  
 Did you have loose stools?      Yes      No

**1. In general, would you say your health is:**

|                         |                         |                         |                         |                         |
|-------------------------|-------------------------|-------------------------|-------------------------|-------------------------|
| <b>Excellent</b>        | <b>Very good</b>        | <b>Good</b>             | <b>Fair</b>             | <b>Poor</b>             |
| <input type="radio"/> 1 | <input type="radio"/> 2 | <input type="radio"/> 3 | <input type="radio"/> 4 | <input type="radio"/> 5 |

**2. Compared to the week before, how would you rate your health in general now?**

|                                          |                                              |                                       |                                             |                                         |
|------------------------------------------|----------------------------------------------|---------------------------------------|---------------------------------------------|-----------------------------------------|
| <b>Much better now than one week ago</b> | <b>Somewhat better now than one week ago</b> | <b>About the same as one week ago</b> | <b>Somewhat worse now than one week ago</b> | <b>Much worse now than one week ago</b> |
| <input type="radio"/> 1                  | <input type="radio"/> 2                      | <input type="radio"/> 3               | <input type="radio"/> 4                     | <input type="radio"/> 5                 |

**3. During the past 1 week, how much of the time have you had any of the following problems with your regular daily activities as a result of your physical health?**

|                                                                                                      |                         |                         |                         |                             |                         |
|------------------------------------------------------------------------------------------------------|-------------------------|-------------------------|-------------------------|-----------------------------|-------------------------|
|                                                                                                      | <b>All of the time</b>  | <b>Most of the time</b> | <b>Some of the time</b> | <b>A little of the time</b> | <b>None of the time</b> |
| a) Cut down on the <b>amount of time</b> you spent on work or other activities                       | <input type="radio"/> 1 | <input type="radio"/> 2 | <input type="radio"/> 3 | <input type="radio"/> 4     | <input type="radio"/> 5 |
| b) <b>Accomplished less</b> than you would like                                                      | <input type="radio"/> 1 | <input type="radio"/> 2 | <input type="radio"/> 3 | <input type="radio"/> 4     | <input type="radio"/> 5 |
| c) Were limited in the <b>kind</b> of work or other activities                                       | <input type="radio"/> 1 | <input type="radio"/> 2 | <input type="radio"/> 3 | <input type="radio"/> 4     | <input type="radio"/> 5 |
| d) Had <b>difficulty</b> performing the work or other activities (for example, it took extra effort) | <input type="radio"/> 1 | <input type="radio"/> 2 | <input type="radio"/> 3 | <input type="radio"/> 4     | <input type="radio"/> 5 |

**4. During the past 1 week, to what extent has your physical health interfered with your normal social activities with family, friends, neighbors, or group?**

|                         |                         |                         |                         |                         |
|-------------------------|-------------------------|-------------------------|-------------------------|-------------------------|
| <b>Not at all</b>       | <b>Slightly</b>         | <b>Moderately</b>       | <b>Quite a bit</b>      | <b>Extremely</b>        |
| <input type="radio"/> 1 | <input type="radio"/> 2 | <input type="radio"/> 3 | <input type="radio"/> 4 | <input type="radio"/> 5 |

**5. During the past week, did you suffer from fatigue?**

|                         |                         |                         |                         |                         |
|-------------------------|-------------------------|-------------------------|-------------------------|-------------------------|
| <b>Not at all</b>       | <b>Slightly</b>         | <b>Moderately</b>       | <b>Quite a bit</b>      | <b>Extremely</b>        |
| <input type="radio"/> 1 | <input type="radio"/> 2 | <input type="radio"/> 3 | <input type="radio"/> 4 | <input type="radio"/> 5 |

**6. How TRUE or FALSE is each of the following statements for you for the past month?**

|                                                         |                         |                         |                         |                         |                         |
|---------------------------------------------------------|-------------------------|-------------------------|-------------------------|-------------------------|-------------------------|
|                                                         | <b>Definitely true</b>  | <b>Mostly true</b>      | <b>Don't know</b>       | <b>Mostly false</b>     | <b>Definitely false</b> |
| a) I seem to get sick a little easier than other people | <input type="radio"/> 1 | <input type="radio"/> 2 | <input type="radio"/> 3 | <input type="radio"/> 4 | <input type="radio"/> 5 |
| b) I am as healthy as anybody I know                    | <input type="radio"/> 1 | <input type="radio"/> 2 | <input type="radio"/> 3 | <input type="radio"/> 4 | <input type="radio"/> 5 |
| c) I expect my health to get worse                      | <input type="radio"/> 1 | <input type="radio"/> 2 | <input type="radio"/> 3 | <input type="radio"/> 4 | <input type="radio"/> 5 |
| d) My health is excellent                               | <input type="radio"/> 1 | <input type="radio"/> 2 | <input type="radio"/> 3 | <input type="radio"/> 4 | <input type="radio"/> 5 |

To help people say how good or bad a health state is, we have drawn a scale (rather like a thermometer) on which the best state you can imagine is marked 100 and the worst state you can imagine is marked 0.

We would like you to indicate on this scale how good or bad your own health is today, in your opinion. Please do this by drawing a line from the box below to whichever point on the scale indicates how good or bad your health state is.

**Your own health state today**

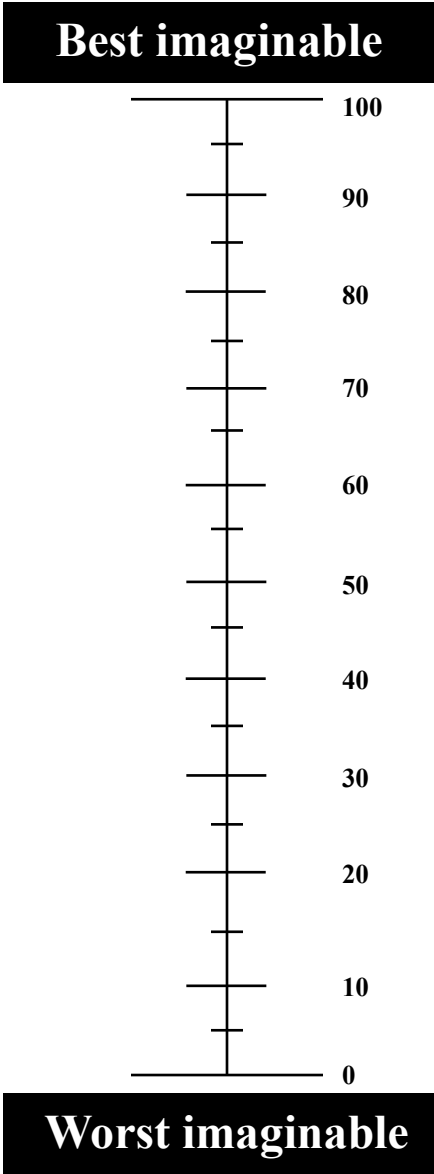

Supplement: pone.0265852.s001.pdf [file pone.0265852.s001.pdf]
